# Supplementary material for: Modeling the genetic relatedness of Plasmodium falciparum parasites following meiotic recombination and cotransmission
Source: PubMed Central journal article supplement (PMC5777656; doi:10.1371/journal.pcbi.1005923), 2018-01-09
Supplement: pcbi.1005923.s009.pdf [file pcbi.1005923.s009.pdf]

| <b>Chromosome</b> | <b>Average Number of Chiasma Events</b> | <b>Standard Deviation</b> |
|-------------------|-----------------------------------------|---------------------------|
| <b>1</b>          | 0.38                                    | 0.68                      |
| <b>2</b>          | 0.78                                    | 0.99                      |
| <b>3</b>          | 0.96                                    | 1.01                      |
| <b>4</b>          | 0.75                                    | 0.84                      |
| <b>5</b>          | 1.01                                    | 0.83                      |
| <b>6</b>          | 1.14                                    | 1.03                      |
| <b>7</b>          | 1.06                                    | 1.1                       |
| <b>8</b>          | 1.06                                    | 1.2                       |
| <b>9</b>          | 1.26                                    | 1.04                      |
| <b>10</b>         | 1.19                                    | 1.13                      |
| <b>11</b>         | 1.55                                    | 1.41                      |
| <b>12</b>         | 1.57                                    | 1.31                      |
| <b>13</b>         | 1.97                                    | 1.34                      |
| <b>14</b>         | 2.45                                    | 1.66                      |
